# Supplementary figures and images for: A Transcriptomics Analysis of the Regulation of Lens Fiber Cell Differentiation in the Absence of FGFRs and PTEN
Source: Preprints.org preprint supplement (doi:10.20944/preprints202404.1742.v1), 2024-04-26

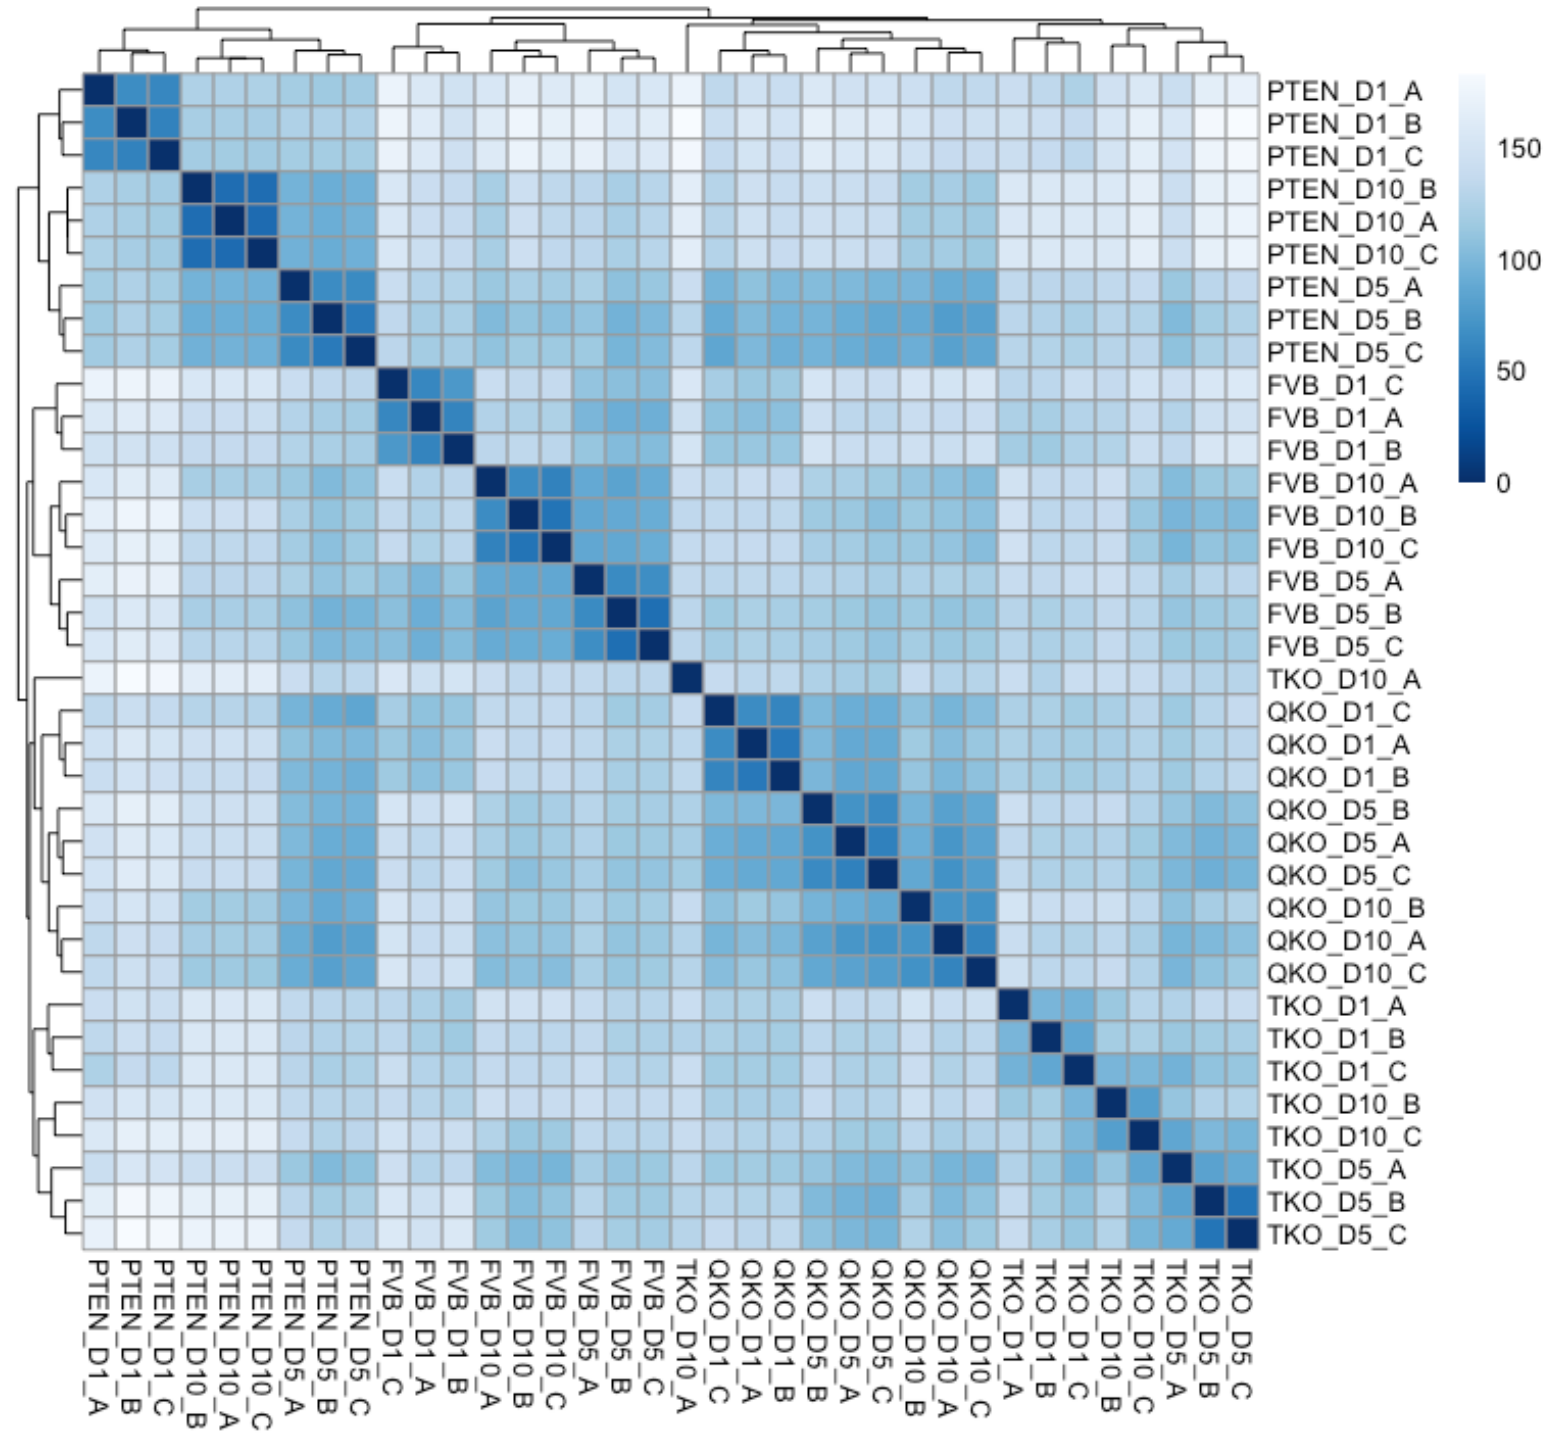

Supplement: Supplementary file 1 [file supplementary]
